# Supplementary material for: A Nomogram for Predicting Non-Response to Surgery One Year after Elective Total Hip Replacement
Source: MDPI journal article supplement (doi:10.3390/jcm11061649), 2022-03-16
Supplement: s1 [file s1]

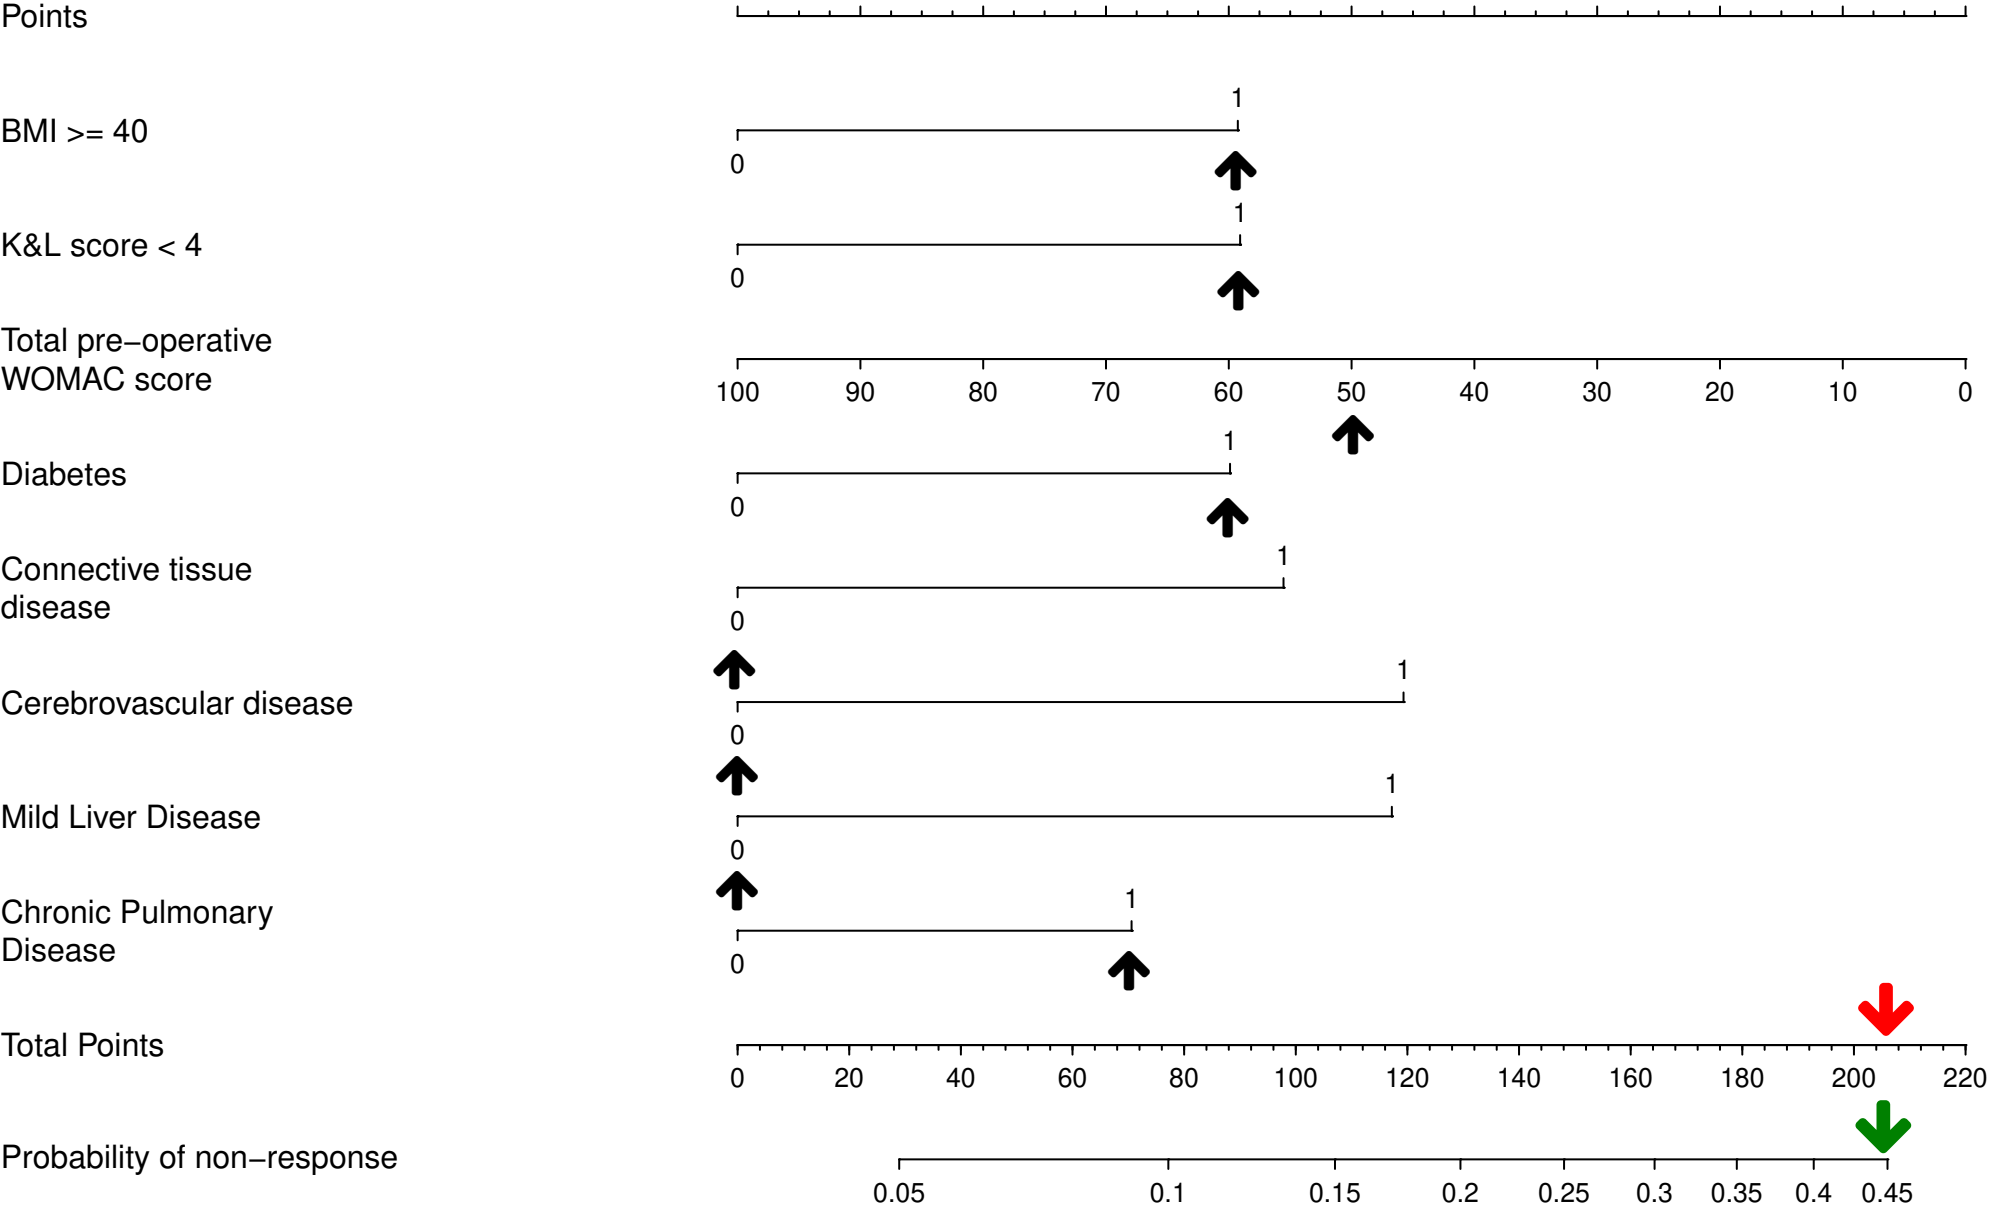

## FIGURE LEGEND

**Supplementary Figure S1:** – Worked example of how to use nomogram.

First match each explanatory variable with the corresponding number of points on the top “Points” scale (black arrows). For example, a patient with a BMI  $\geq 40$  kg/m<sup>2</sup> matches to 41 points, a K-L Grade of 3 corresponds to 41 points, a baseline WOMAC score of 50 matches to 50 points, comorbid diabetes corresponds to 40 points and chronic pulmonary disease matches to 33 points. This sums to a cumulative total of 205 points (red arrow). Drawing a line down from the “Total Points” scale to the corresponding “Probability of non-response” scale reveals that 205 total points corresponds to a non-response probability for this particular patient of 45% (green arrow).
