# Supplementary material for: A Nomogram for Predicting Non-Response to Surgery One Year after Elective Total Hip Replacement
Source: MDPI journal article supplement (doi:10.3390/jcm11061649), 2022-03-16
Supplement: s1 [file s1]

**Supplementary Table S1: Clinical characteristics**

| <b>Variable</b>            | <b>Overall<br/>(N=2,177)</b> | <b>Responder<br/>(N=1,983)</b> | <b>Non-Responder<br/>(N=194)</b> | <b>p-<br/>value</b> |
|----------------------------|------------------------------|--------------------------------|----------------------------------|---------------------|
| Contralateral THR, [N (%)] |                              |                                |                                  |                     |
| Yes                        | 596 (27.4)                   | 531 (89.1)                     | 65 (10.9)                        | .045                |
| No                         | 1,581 (72.6)                 | 1,452 (91.8)                   | 129 (8.2)                        |                     |
| Approach [N (%)]           |                              |                                |                                  |                     |
| Anterior                   | 486 (22.3)                   | 457 (94.0)                     | 61 (6.0)                         | .003                |
| Hardinge                   | 713 (32.8)                   | 628 (88.1)                     | 29 (11.9)                        |                     |
| Posterior                  | 900 (41.3)                   | 828 (92.0)                     | 72 (8.0)                         |                     |
| Superpath                  | 78 (3.6)                     | 70 (89.7)                      | 8 (10.3)                         |                     |
| Cementation [N (%)]        |                              |                                |                                  |                     |
| Uncemented                 | 706 (32.4)                   | 655 (92.8)                     | 51 (7.2)                         | .122                |
| Hybrid                     | 1,355 (62.2)                 | 1,221 (90.1)                   | 134 (9.9)                        |                     |
| Totally Cemented           | 114 (5.2)                    | 105 (92.1)                     | 9 (7.9)                          |                     |
| Femoral Head Size, [N (%)] |                              |                                |                                  |                     |
| 22                         | 7 (0.3)                      | 6 (85.7)                       | 1 (14.3)                         | .682                |
| 28                         | 181 (8.3)                    | 168 (92.8)                     | 13 (7.2)                         |                     |
| 32                         | 1,406 (64.6)                 | 1,283 (91.3)                   | 123 (8.7)                        |                     |
| 36                         | 583 (26.8)                   | 526 (90.2)                     | 57 (9.8)                         |                     |
| Length of Stay [mean (SD)] | 4.5 (2.6)                    | 4.5 (2.7)                      | 4.7 (2.1)                        | .191                |
| Discharge Destination      |                              |                                |                                  |                     |
| Home                       | 1,723 (79.1)                 | 1,599 (92.8)                   | 124 (7.2)                        | <.001               |
| Rehabilitation             | 454 (20.9)                   | 384 (84.6)                     | 70 (15.4)                        |                     |
| Complication/Adverse event |                              |                                |                                  |                     |
| Clavien-Dindo Grade I      | 195 (9.0)                    | 172 (88.2)                     | 23 (11.8)                        | .139                |
| Clavien-Dindo Grade II     | 159 (7.3)                    | 139 (87.4)                     | 20 (12.6)                        | .092                |
| Clavien-Dindo Grade III    | 90 (4.1)                     | 74 (82.2)                      | 16 (17.8)                        | .003                |
| Clavien-Dindo Grade IV     | 13 (0.6)                     | 13 (100.0)                     | 0 (0.0)                          | .258                |
| Unplanned Readmission      |                              |                                |                                  |                     |
| Yes                        | 90 (4.1)                     | 76 (84.4)                      | 14 (15.6)                        | .207                |
| No                         | 2,087 (95.9)                 | 1,907 (91.4)                   | 180 (9.6)                        |                     |

**Supplementary Table S2: Charlson Comorbidities**

| <b>Variable</b>                  | <b>Overall<br/>(N=2,177)</b> | <b>Responder<br/>(N=1,983)</b> | <b>Non-Responder<br/>(N=194)</b> | <b>p-<br/>value</b> |
|----------------------------------|------------------------------|--------------------------------|----------------------------------|---------------------|
| Cerebrovascular disease          | 91 (4.2)                     | 75 (82.4)                      | 16 (17.6)                        | .003                |
| Chronic pulmonary disease        | 159 (7.3)                    | 137 (86.4)                     | 22 (13.8)                        | .024                |
| Congestive heart failure         | 51 (2.3)                     | 47 (92.2)                      | 4 (7.8)                          | .786                |
| Connective tissue disease        | 126 (5.8)                    | 108 (85.7)                     | 18 (14.3)                        | .029                |
| Dementia                         | 14 (0.6)                     | 13 (82.9)                      | 1 (7.1)                          | .816                |
| Diabetes                         | 294 (13.5)                   | 253 (86.1)                     | 41 (13.9)                        | .001                |
| Mild liver disease               | 37 (1.7)                     | 30 (81.1)                      | 7 (19.9)                         | .031                |
| Myocardial infarct               | 131 (6.0)                    | 117 (89.3)                     | 14 (10.7)                        | .462                |
| Peripheral vascular disease      | 25 (1.1)                     | 23 (92.0)                      | 2 (8.0)                          | .872                |
| Peptic ulcer disease             | 52 (2.4)                     | 44 (84.6)                      | 8 (15.4)                         | .097                |
| Any tumor                        | 96 (4.4)                     | 85 (88.5)                      | 11 (11.5)                        | .370                |
| Diabetes/end organ damage        | 31 (1.4)                     | 27 (87.1)                      | 4 (12.9)                         | .432                |
| Hemiplegia                       | 2 (0.1)                      | 1 (50.0)                       | 1 (50.0)                         | .041                |
| Leukemia                         | 2 (0.1)                      | 2 (100.0)                      | 0 (100.0)                        | .658                |
| Lymphoma                         | 22 (1.0)                     | 19 (86.4)                      | 3 (13.6)                         | .434                |
| Moderate or severe renal disease | 86 (4.0)                     | 75 (87.2)                      | 11 (12.8)                        | .198                |
| Moderate or severe liver disease | 14 (0.6)                     | 11 (78.6)                      | 3 (21.4)                         | .099                |
| Metastatic solid tumor           | 7 (0.3)                      | 7 (100.0)                      | 0 (0.0)                          | .407                |

**Supplementary Table S3: Predictors of non-response to THR**

|                           |                            |                        |         | Nomogram Candidate 1 |          | Nomogram Candidate 2 |          |
|---------------------------|----------------------------|------------------------|---------|----------------------|----------|----------------------|----------|
| Predictor                 | Category                   | Unadjusted OR (95% CI) | p-value | Adjusted OR (95% CI) | *p-value | Adjusted OR (95% CI) | *p-value |
| Age (years)               |                            | 1.01 (1.00, 1.03)      | .065    |                      |          |                      |          |
| Sex                       | Male                       | Reference              |         |                      |          |                      |          |
|                           | Female                     | 1.03 (0.76, 1.40)      | .829    |                      |          |                      |          |
| BMI (continuous)          |                            | 1.02 (1.00, 1.05)      | .050    |                      |          |                      |          |
| Obesity Class             | <30kg/m <sup>2</sup>       | Reference              |         |                      |          |                      |          |
|                           | ≥30 - <35kg/m <sup>2</sup> | 1.06 (0.74, 1.51)      | .753    |                      |          |                      |          |
|                           | ≥35 - <40kg/m <sup>2</sup> | 1.24 (0.79, 1.94)      | .652    |                      |          |                      |          |
|                           | ≥40kg/m <sup>2</sup>       | 1.97 (1.21, 3.21)      | .007    |                      |          |                      |          |
| BMI ≥40kg/m <sup>2</sup>  |                            | 1.87 (1.18, 2.98)      | .008    | 1.83 (1.12, 2.97)    | .015     | 1.88 (1.16, 3.05)    | .011     |
| ASA (continuous)          |                            | 1.37 (1.09, 1.74)      | .008    |                      |          |                      |          |
| ASA ≥3                    |                            | 1.45 (1.09, 1.96)      | .014    | NS                   |          |                      |          |
| K-L Grade                 | 4                          | Reference              |         | Reference            |          |                      |          |
|                           | ≤3                         | 1.99 (1.47, 2.69)      | <.001   | 1.93 (1.41, 2.63)    | <.001    | 1.89 (1.39, 2.56)    | <.001    |
| Aetiology                 | Osteoarthritis             | Reference              |         |                      |          |                      |          |
|                           | Rheumatoid arthritis       | 1.49 (0.77, 2.89)      | .239    |                      |          |                      |          |
|                           | Avascular necrosis         | 1.43 (0.84, 2.34)      | .189    |                      |          |                      |          |
|                           | Dysplasia                  | 1.38 (1.01, 1.87)      | .415    |                      |          |                      |          |
| CCI (continuous)          |                            | 1.25 (1.13, 1.38)      | <.001   |                      |          |                      |          |
| CCI (categorical)         | 0                          | Reference              |         | Reference            |          |                      |          |
|                           | 1                          | 1.53 (1.06, 2.20)      | .022    | 1.62 (1.12, 2.34)    | .011     |                      |          |
|                           | ≥2                         | 2.36 (1.64, 3.40)      | <.001   | 2.54 (1.75, 3.69)    | <.001    |                      |          |
| Cerebrovascular disease   |                            | 2.29 (1.29, 4.07)      | .005    |                      |          | 2.39 (1.33, 4.30)    | .004     |
| Chronic pulmonary disease |                            | 1.72 (1.05, 2.82)      | .030    |                      |          | 1.64 (1.00, 2.71)    | .052     |
| Congestive heart failure  |                            | 1.11 (0.44, 2.79)      | .818    |                      |          |                      |          |

|                               |                   |      |                   |       |                   |       |
|-------------------------------|-------------------|------|-------------------|-------|-------------------|-------|
| Connective tissue disease     | 1.90 (1.13, 3.21) | .016 |                   |       | 1.99 (1.17, 3.39) | .011  |
| Dementia                      | 0.79 (0.10, 6.17) | .818 |                   |       |                   |       |
| Diabetes                      | 1.83 (1.26, 2.66) | .002 |                   |       | 1.86 (1.26, 2.75) | .002  |
| Mild liver disease            | 2.44 (1.06, 5.61) | .036 |                   |       | 2.28 (0.99, 5.27) | .053  |
| Myocardial infarct            | 1.35 (0.75, 2.44) | .322 |                   |       |                   |       |
| Peripheral vascular disease   | 1.40 (0.41, 4.76) | .590 |                   |       |                   |       |
| Peptic ulcer disease          | 1.34 (0.56, 3.22) | .507 |                   |       |                   |       |
| Any tumour                    | 0.74 (0.39, 1.42) | .372 |                   |       |                   |       |
| Diabetes/end organ damage     | 1.53 (0.56, 4.13) | .407 |                   |       |                   |       |
| Hemiplegia                    | Insufficient no's |      |                   |       |                   |       |
| Leukaemia                     | Insufficient no's |      |                   |       |                   |       |
| Lymphoma                      | 1.62 (0.47, 5.64) | .445 |                   |       |                   |       |
| Moderate/severe renal disease | 1.53 (0.81, 2.89) | .192 |                   |       |                   |       |
| Moderate/severe liver disease | 2.82 (0.84, 9.46) | .094 |                   |       |                   |       |
| Metastatic solid tumour       | Insufficient no's |      |                   |       |                   |       |
| Pre-op VR12 PCS               | 0.99 (0.97, 1.01) | .366 |                   |       |                   |       |
| Pre-op VR12 MCS               | 0.99 (0.98, 1.00) | .206 |                   |       |                   |       |
| Pre-op WOMAC Pain             | 0.99 (0.98, 0.99) | .002 |                   |       |                   |       |
| Pre-op WOMAC Motion           | 0.99 (0.98, 0.99) | .023 |                   |       |                   |       |
| Pre-op WOMAC Function         | 0.99 (0.98, 0.99) | .001 |                   |       |                   |       |
| Pre-op WOMAC Global           | 0.87 (0.80, 0.94) | .001 | 0.86 (0.79, 0.94) | <.001 | 0.86 (0.79, 0.94) | <.001 |
| per 10 units                  |                   |      |                   |       |                   |       |

\*Hosmer & Lemeshow: p>0.05
